# Supplementary material for: Structurally-defined semi-interpenetrating amphiphilic polymer networks with tunable and predictable mechanical response
Source: Royal Society of Chemistry journal article supplement (doi:10.1039/c6ra07376j), 2016-01-01
Supplement: c6ra07376j1.pdf [file c6ra07376j1.pdf]

ELECTRONIC SUPPLEMENTARY INFORMATION

**Structurally-Defined Semi-Interpenetrating Amphiphilic Polymer Networks with Tunable and Predictable Mechanical Response**

Mariliz Achilleos, Fotios Mpekris, Triantafyllos Stylianopoulos\* and Theodora Krasia-Christoforou\*

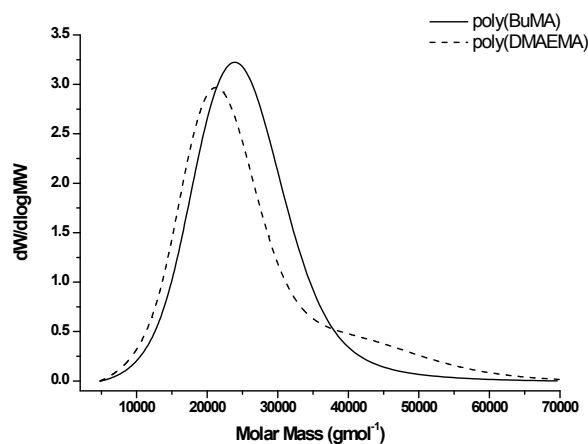

**Figure S1.** SEC traces of poly(DMAEMA) and poly(BuMA) linear polymers employed as precursors to the BIEE-crosslinked semi-IPN amphiphilic polymer networks.

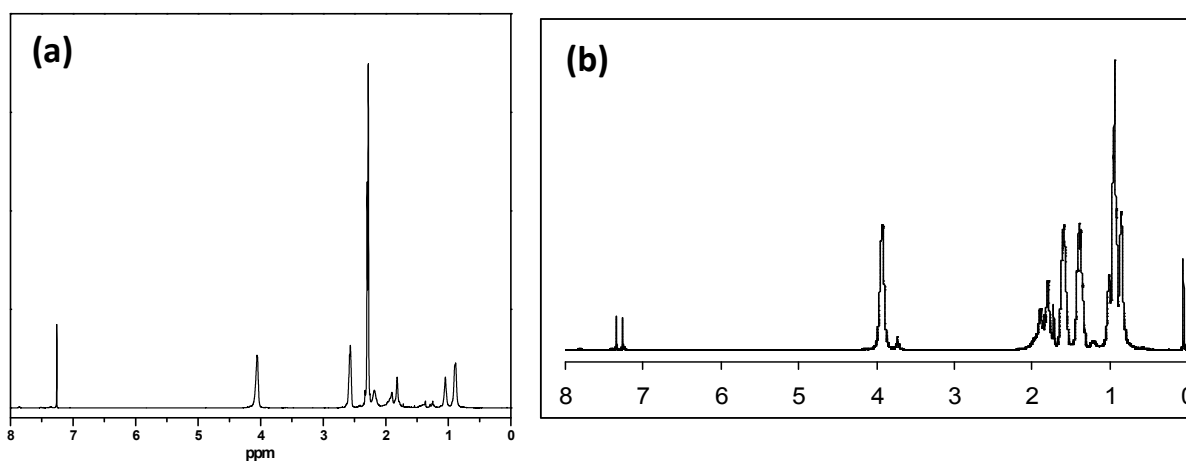

**Figure S2.** <sup>1</sup>H NMR spectra of (a) poly(DMAEMA) and (b) poly(BuMA) linear precursors to the semi-IPN amphiphilic polymer networks.
